# Supplementary material for: Variations in the biological pump throughout the Miocene: evidence from organic carbon burial in Pacific Ocean sediments
Source: Copernicus journal article supplement (doi:10.5194/cp-20-2685-2024), 2024-12-12
Supplement: Supplementary file 1 [file cp-20-2685-2024-supplement.zip]

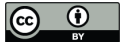

## *Supplement of*

# **Variations in the biological pump throughout the Miocene: evidence from organic carbon burial in Pacific Ocean sediments**

Mitchell Lyle and Annette Olivarez Lyle

*Correspondence to:* Mitchell Lyle (lylem@oregonstate.edu)

- cp-20-2685-2024-supplement-title-page.pdf
- 2024-10-20 Lyle et al Cenozoic Corg supplemental material.pdf
- supplemental tables
  - SuppTable\_S10\_1208A\_carbon\_Data.xlsx
  - SuppTable\_S11\_U1337S\_agedepth\_MAR\_20Ma\_Data.xlsx
  - SuppTable\_S12\_U1337\_Carbon\_data.xlsx
  - SuppTable\_S13\_U1338\_Corg\_and\_MAR.xlsx
  - SuppTable\_S14\_U1338\_age\_model\_XRF\_MAR.xlsx
  - SuppTable\_S15\_806B\_Strat\_data.xlsx
  - SuppTable\_S16\_806B\_agemodel.xlsx
  - SuppTable\_S17\_806B\_Carbon\_Data.xlsx
  - SuppTable\_S18\_807A\_Strat\_table.xlsx
  - SuppTable\_S19\_807A\_Age\_Depth.xlsx
  - SuppTable\_S1\_Site574\_Splice\_Intervals.xlsx
  - SuppTable\_S20\_807A\_Carbon\_Data.xlsx
  - SuppTable\_S2\_Site574 disturbance table.xlsx
  - SuppTable\_S3\_574 est CaCO<sub>3</sub> and corr age.xlsx
  - SuppTable\_S4\_574\_Carbon\_table.xlsx
  - SuppTable\_S5\_574A XRF data.xlsx
  - SuppTable\_S6\_U574X XRF data.xlsx
  - SuppTable\_S7\_884B\_AgeDepth.xlsx
  - SuppTable\_S8\_884B\_carb\_Data.xlsx
  - SuppTable\_S9\_1208A\_pmag\_Data.xlsx

The copyright of individual parts of the supplement might differ from the article licence.
